# The American Journal of Psychiatry

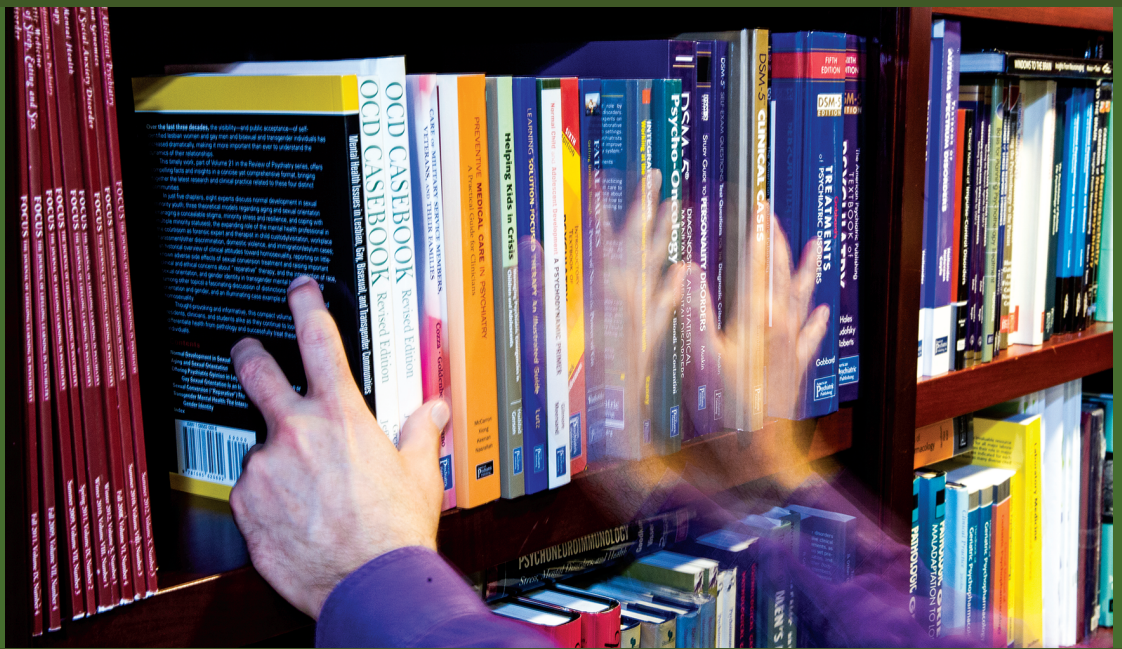

Functional Neuroimaging of Avoidance Habits in  
Obsessive-Compulsive Disorder

Psychiatric Treatment of a Health Care Worker After Infection  
With Ebola Virus in Lagos, Nigeria

Improvement in Psychotic Symptoms After a Gluten-Free Diet  
in a Boy With Complex Autoimmune Illness

Prescription Practices in the Treatment of First-Episode Schizophrenia  
Spectrum Disorders: Data From the National RAISE-ETP Study
